# Supplementary material for: Barriers to transmission of transcriptional noise in a c-fos c-jun pathway
Source: PubMed Central journal article supplement — Mol Syst Biol. 2013 Sep 10;9:687. doi: 10.1038/msb.2013.45 (PMC3792345; doi:10.1038/msb.2013.45), 2013-09-10
Supplement: msb201345-s1.pdf [file msb201345-s1.pdf]

Supplementary information associated with

## **Barriers to Transmission of Transcriptional Noise in a c-fos c-jun Pathway**

Khyati Shah,<sup>1,2</sup> Sanjay Tyagi<sup>1\*</sup>

<sup>1</sup> Public Health Research Institute, New Jersey Medical School, Rutgers University, Newark, NJ 07103

<sup>2</sup> New Jersey Institute of Technology, Newark, NJ 07102

Corresponding author: [Sanjay.Tyagi@rutgers.edu](mailto:Sanjay.Tyagi@rutgers.edu)

### Content:

- Figure S1 c-fos and c-jun protein quantification by Immunofluorescence
- Figure S2 Coefficients of variation of different species in the c-fos/c-jun pathway
- Figure S3 Correlation between two downstream mRNAs in single cells
- Figure S4 Occupancy of promoters of c-fos, c-jun and collagenase 1 gene by RNA Polymerase II.

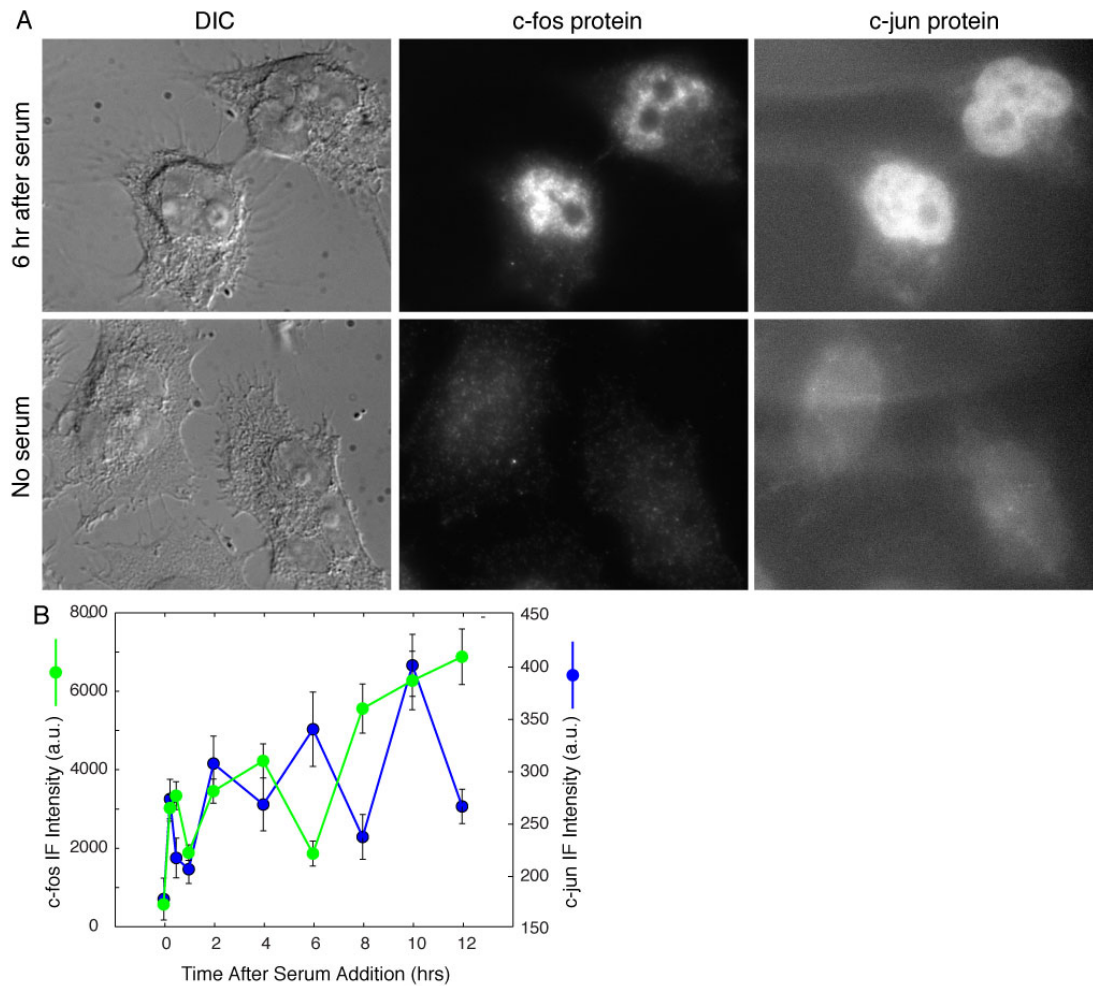

**Fig. S1.** Imaging c-fos and c-jun proteins in single cells by Immunofluorescence (IF). **A.** A mouse antibody specific for c-fos and a rabbit antibody specific for c-jun were used to probe HeLa cells with and without serum induction. The primary antibodies were detected using species-specific secondary antibodies labeled with distinguishable fluorophores. **B.** Fluorescence intensities integrated over the area of nucleus as a function of time after serum addition. The error bars represent 95% CI.

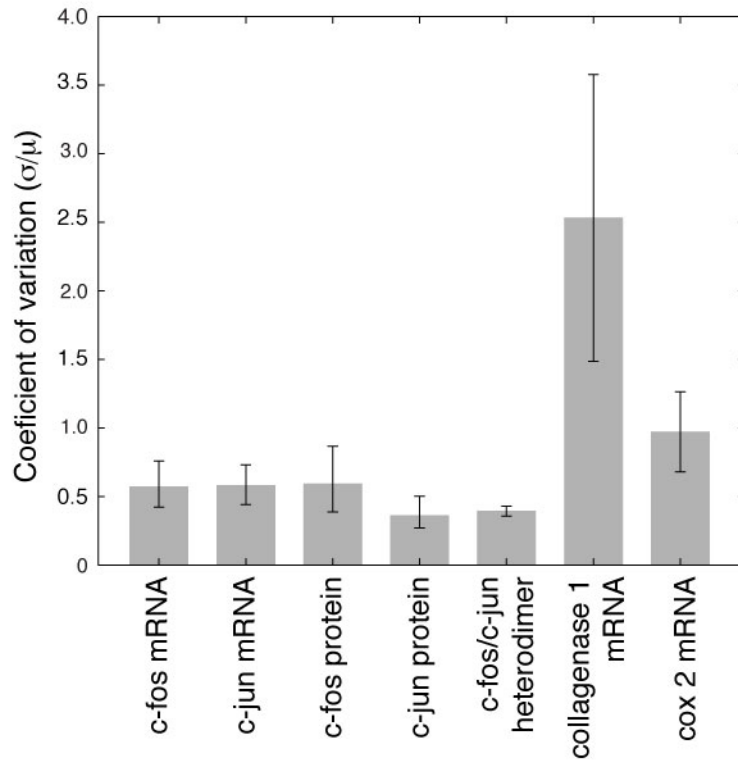

**Fig. S2.** Cell-to-cell variation (coefficient of variation, standard deviation/mean) in different species in the c-fos/c-jun pathway. The data for c-fos and c-jun mRNAs is from cells at 30 min after serum addition and for the other species it is 6 hr after serum addition. The error bars represent 95% CI.

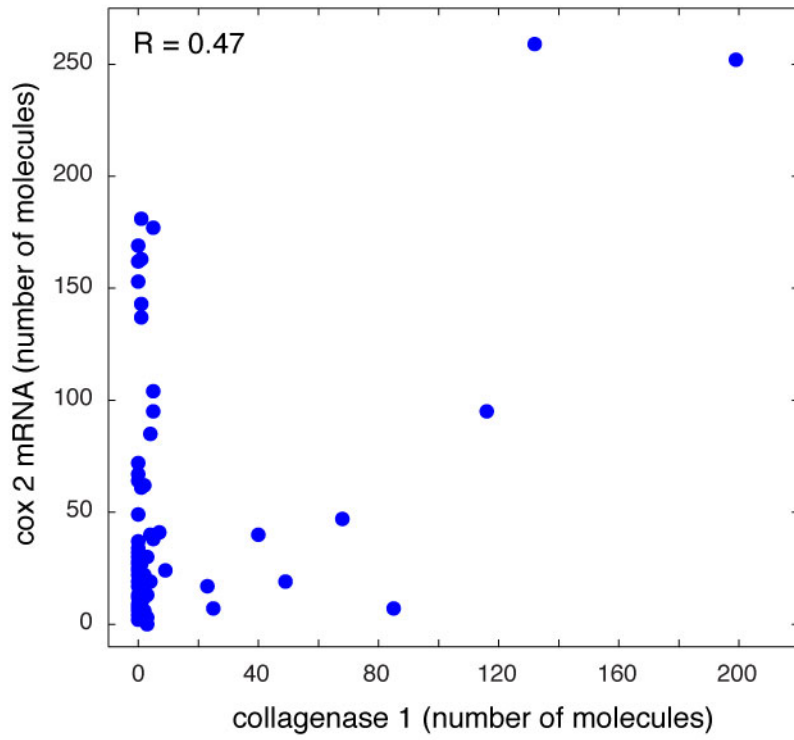

**Fig. S3.** Correlation between two downstream mRNAs in the same cells at 6 hr after serum addition.

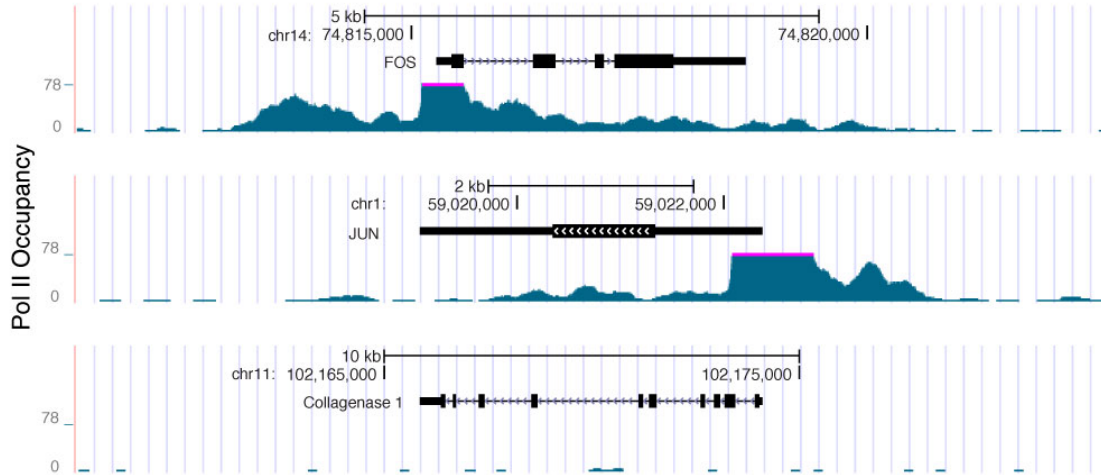

**Fig. S4.** Occupancy of promoters of c-fos, c-jun and collagenase 1 gene by RNA Polymerase II in steadily growing HeLa cells. Chromatin immunoprecipitation data was obtained from the ENCODE consortium and plotted using the UCSC genome browser.
